# Supplementary material for: Adapting the Intensity Gradient for Use with Count-Based Accelerometry Data in Children and Adolescents
Source: MDPI journal article supplement (doi:10.3390/s24103019), 2024-05-10
Supplement: s1 [file s1]

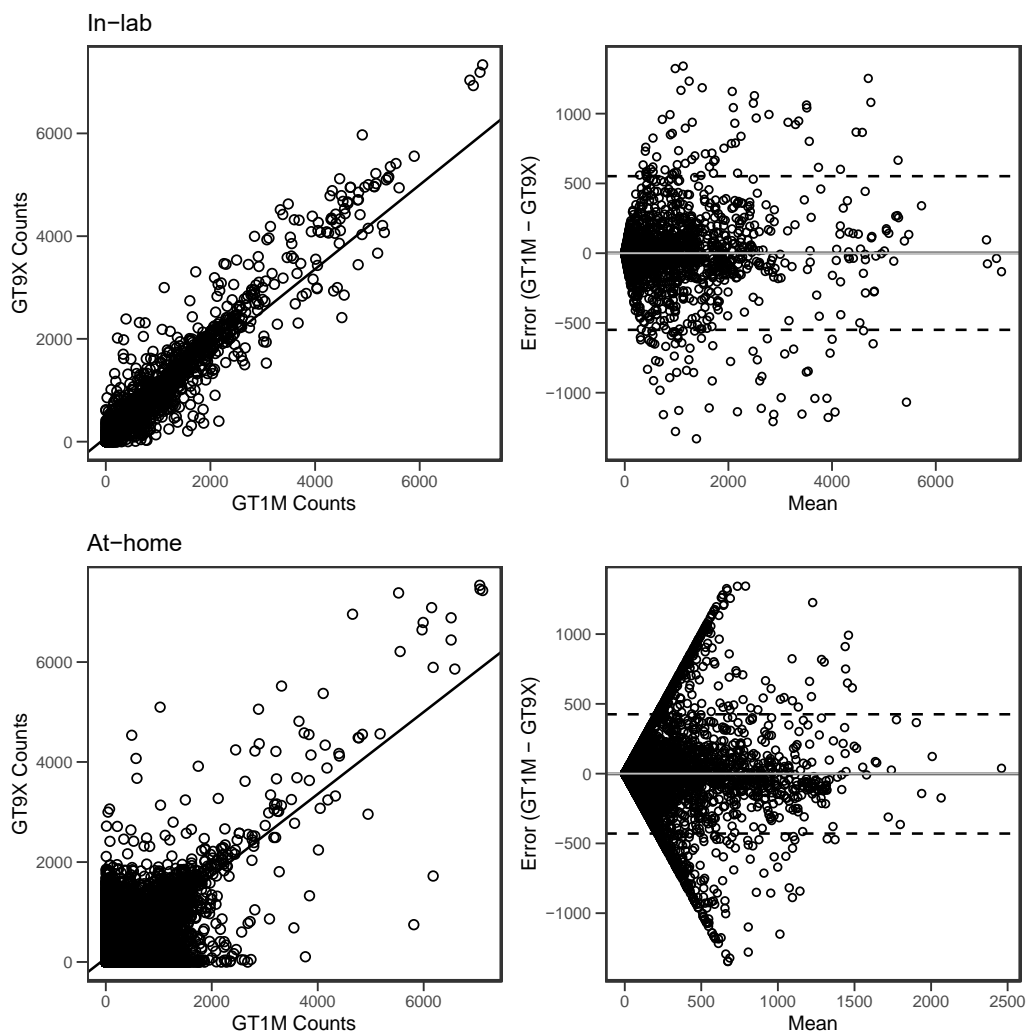

**Figure S1:** Linear regression and Bland-Altman plots for combined in-lab and at-home count data. Linear regressions show the line of best fit; the Bland-Altman plots show the mean difference as the solid black line, the zero line as the solid grey line, and upper and lower 95% limits of agreement as dotted lines.

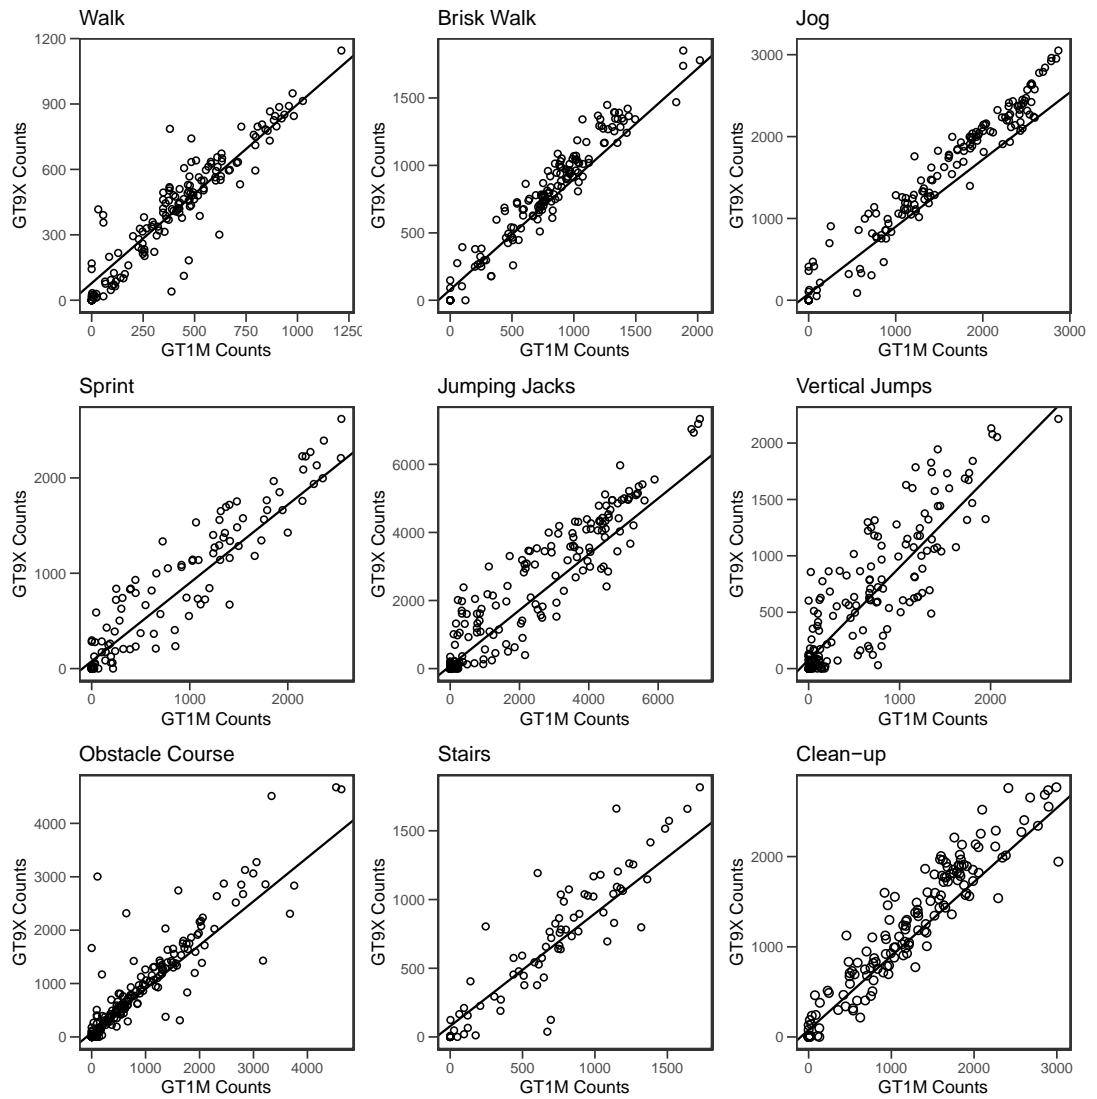

**Figure S2:** Linear regression plots for each individual activity performed during the in-lab testing session. Data from all participants are combined. Plots show the line of best fit based on multiple linear regression [17].
